# Supplementary material for: Whole Proteome Clustering of 2,307 Proteobacterial Genomes Reveals Conserved Proteins and Significant Annotation Issues
Source: Front Microbiol. 2019 Feb 28;10:383. doi: 10.3389/fmicb.2019.00383 (PMC6403173; doi:10.3389/fmicb.2019.00383)
Supplement: Supplementary file 3 [file Table_2.xlsx]

## Sheet: Supp.Table.2
					Supplementary Table S2. List of Organisms Removed from the Study.
Organism Number	Organism Name	SubGroup	Size, Mb.	GC content, %	GCA File	Number of protein sequences	Reason for removal
254	Campylobacter curvus 525.92	delta/epsilon subdivisions	1.97126	44.5	GCA_000017465.1_ASM1746v1_protein.faa	1931	This assembly has been removed from RefSeq.
593	Campylobacter jejuni subsp. jejuni ICDCCJ07001	delta/epsilon subdivisions	1.70892	30.551	GCA_000184085.1_ASM18408v1_protein.faa	1531	Many protein products of genes with frameshifts were annotated; this RefSeq record was removed because data validation identified problems with the assembly or annotation.
835	Salmonella enterica subsp. enterica serovar Newport str. CVM 21554	Gammaproteobacteria	4.72669	52.3	GCA_000272795.2_ASM27279v2_protein.faa	2783	Multiple protein products of genes with frameshifts were annotated; incomplete sequence repository.
1103	synthetic Escherichia coli C321.deltaA	Gammaproteobacteria	4.64355	50.8	GCA_000474035.1_ASM47403v1_protein.faa	4103	Synthetic strain; all stop codons re-coded.
1256	Salmonella enterica subsp. enterica serovar Enteritidis str. SA20093266	Gammaproteobacteria	4.74677	52.2	GCA_000623155.1_ASM62315v1_protein.faa	4182	Multiple pseudo or disrupted genes identified by our inspection.
1281	Salmonella enterica subsp. enterica serovar Enteritidis str. EC20120009	Gammaproteobacteria	4.75453	52.1	GCA_000626395.1_ASM62639v1_protein.faa	1814	Multiple protein products of genes with frameshifts were annotated; missing rRNA genes.
1283	Salmonella enterica subsp. enterica serovar Enteritidis str. SA20084644	Gammaproteobacteria	4.5728	52.2	GCA_000626475.1_ASM62647v1_protein.faa	4218	Missing rRNA genes.
1284	Salmonella enterica subsp. enterica serovar Enteritidis str. SA20084824	Gammaproteobacteria	4.5815	52.2	GCA_000626495.1_ASM62649v1_protein.faa	4224	Missing tRNA genes.
1285	Salmonella enterica subsp. enterica serovar Enteritidis str. SA20094177	Gammaproteobacteria	4.65447	52.1	GCA_000626515.1_ASM62651v1_protein.faa	4287	Missing rRNA genes.
1339	Klebsiella pneumoniae subsp. pneumoniae KP5-1	Gammaproteobacteria	5.55147	57.2718	GCA_000714635.1_ASM71463v1_protein.faa	4918	Missing rRNA genes.
1423	Brucella suis	Alphaproteobacteria	3.44086	57.3	GCA_000755105.1_ASM75510v1_protein.faa	3090	Excluded from RefSeq because genome length too large.
1619	Marinobacter similis	Gammaproteobacteria	3.9759	57.6	GCA_000830985.1_ASM83098v1_protein.faa	2692	Multiple protein products of genes with frameshifts were annotated.
1620	Marinobacter salarius	Gammaproteobacteria	4.61653	57.1	GCA_000831005.1_ASM83100v1_protein.faa	3168	Multiple pseudo or disrupted genes identified by our inspection.
1686	Alteromonas australica	Gammaproteobacteria	4.45747	44.9	GCA_000934525.1_ASM93452v1_protein.faa	3158	Missing rRNA genes.
1687	Rhodocyclaceae bacterium PG1-Ca6	Betaproteobacteria	2.93461	55.1	GCA_000934545.1_ASM93454v1_protein.faa	2457	Missing tRNA genes.
1975	Pseudomonadaceae bacterium D2441	Gammaproteobacteria	2.40055	47.3	GCA_001267235.1_ASM126723v1_protein.faa	2173	Missing tRNA genes.
2143	Pseudomonas aeruginosa	Gammaproteobacteria	6.12302	66.7	GCA_001465155.1_ASM146515v1_protein.faa	5285	Multiple protein products of genes with frameshifts were annotated.
2230	Escherichia coli	Gammaproteobacteria	5.31504	50.7687	GCA_001513655.1_ASM151365v1_protein.faa	4695	Multiple protein products of genes with frameshifts were annotated.
2318	Achromobacter xylosoxidans	Betaproteobacteria	6.26308	67.8	GCA_001559195.1_ASM155919v1_protein.faa	3545	Multiple pseudo or disrupted genes identified by our inspection.
